# Supplementary material for: Association of Donanemab Treatment With Exploratory Plasma Biomarkers in Early Symptomatic Alzheimer Disease: A Secondary Analysis of the TRAILBLAZER-ALZ Randomized Clinical Trial
Source: PubMed Central journal article supplement — JAMA Neurol. 2022 Oct 17;79(12):1250–9. doi: 10.1001/jamaneurol.2022.3392 (PMC9577883; doi:10.1001/jamaneurol.2022.3392), 2022-10-17
Supplement: jamaneurol-e223392-s003.pdf [file jamaneurol-e223392-s003.pdf]

## Data Sharing Statement

Pontecorvo. Association of Donanemab Treatment With Exploratory Plasma Biomarkers in Early Symptomatic Alzheimer Disease. *JAMA Neurol.* Published October 17, 2022.  
doi:10.1001/jamaneurol.2022.3392

### Data

**Data available:** Yes

**Data types:** Other (please specify)

**Additional Information:** All of the individual participant data collected during the trial, after anonymization with the exception of pharmacokinetic or genetic data.

**How to access data:** Proposals should be submitted at [www.vivli.org](http://www.vivli.org) data requestors will need to sign a data sharing agreement. Data for each proposal are available in a controlled access environment.

**When available:** beginning date: 01-31-2024

### Supporting Documents

**Document types:** Other (please specify)

**Additional Information:** Study protocol, statistical analysis plan, clinical study report, blank or annotated case report forms

**How to access documents:** Proposals should be submitted at [www.vivli.org](http://www.vivli.org) data requestors will need to sign a data sharing agreement. Data for each proposal are available in a controlled access environment.

**When available:** beginning date: 01-31-2024

### Additional Information

**Who can access the data:** Investigators whose proposed use of the data has been approved by an independent review committee (“learned intermediary”) identified for this purpose.

**Types of analyses:** To achieve aims in the approved proposal

**Mechanisms of data availability:** Proposals should be submitted at [www.vivli.org](http://www.vivli.org) data requestors will need to sign a data sharing agreement. Data for each proposal are available in a controlled access environment.

**Any additional restrictions:** Data are available 6 months after the primary publication and approval of the indication studied in the US and EU, whichever is later. The data are available indefinitely.
